# Supplementary material for: Overexpression of Uridine-Cytidine Kinase 2 Correlates with Breast Cancer Progression and Poor Prognosis
Source: PubMed Central journal article supplement — J Breast Cancer. 2017 Jun 26;20(2):132–41. doi: 10.4048/jbc.2017.20.2.132 (PMC5500396; doi:10.4048/jbc.2017.20.2.132), 2017-06-26
Supplement: jbc-20-132-s001.pdf [file jbc-20-132-s001.pdf]

**Supplementary Table 1.** Summary of public breast cancer microarray datasets used in the survival analysis

| Accession No.         | GSE1456      | GSE2034   | GSE4922             | GSE7390          | GSE10885       | GSE222226        | GSE24450   | GSE25066   | GSE53031   | GSE58812   | NKI              |
|-----------------------|--------------|-----------|---------------------|------------------|----------------|------------------|------------|------------|------------|------------|------------------|
| No. of patients       | 159          | 286       | 249                 | 198              | 244            | 150              | 183        | 508        | 167        | 107        | 295              |
| Assessable cases      | 159          | 253       | 213                 | 158              | 242            | 149              | 183        | 198        | 167        | 107        | 295              |
| Date of study         | 1994–1996    | 1980–1995 | 1987–1989/2000–2002 | 1980–1998        | N/A            | N/A              | 1997–2004  | N/A        | 1996–2010  | 1998–2007  | 1984–1995        |
| Platforms*            | GPL96, GPL97 | GPL96     | GPL96, GPL97        | GPL96            | GPL885, GPL887 | GPL1708, GPL4133 | GPL6947    | GLP96      | GPL13667   | GPL570     | Agilent 25K Chip |
| Country               | Sweden       | USA       | Singapore/Sweden    | France/Sweden/UK | USA            | USA              | Finland    | USA        | Italy      | France     | Netherlands      |
| Age (yr) <sup>†</sup> | N/A          | N/A       | NA                  | 46 (24–60)       | 53 (24–88)     | 48 (31–65)       | N/A        | 48 (24–72) | 36 (29–47) | 57 (28–84) | 44 (26–53)       |
| Tumor size            | N/A          | N/A       | Y                   | Y                | Y              | Y                | N/A        | N/A        | Y          | N/A        | Y                |
| Histologic grade      | Y            | N/A       | Y                   | Y                | Y              | Y                | N/A        | Y          | Y          | N/A        | Y                |
| Lymph node status     | N/A          | Y         | Y                   | Y                | N/A            | N/A              | N/A        | N/A        | NA         | N/A        | Y                |
| ER status             | Y            | Y         | Y                   | Y                | Y              | Y                | N/A        | Y          | Y          | Y          | Y                |
| Chemotherapy          | N/A          | N/A       | N/A                 | N/A              | N/A            | Y                | N/A        | N/A        | N/A        | N/A        | Y                |
| OS range (mo)         | 2.2–101.9    | N/A       | N/A                 | 4.9–303.6        | 1–96.0         | 9.5–82.0         | 22.4–120.0 | N/A        | N/A        | 1–171.7    | 1.0–220.1        |
| DFS range (mo)        | 2.2–101.9    | 2.0–171.0 | 0–153.0             | 4–231.4          | 1–96.0         | 6.0–84.0         | 0.8–60.0   | 1.7–88.3   | 2.0–156.0  | 1–171.7    | 1.0–220.1        |

NA = not applicable; Y = yes; ER = estrogen receptor; OS = overall survival; DFS = disease-free survival.

\*Platforms: GPL96: [HG-U133A] Affymetrix Human Genome U133A Array; GPL97: [HG-U133B] Affymetrix Human Genome U133B Array; GPL570: [HG-U133\_Plus\_2] Affymetrix Human Genome U133 Plus 2.0 Array; GPL885: Agilent-011521 Human 1A Microarray G4110A; GPL887: Agilent-012097 Human 1A Microarray (V2) G4110B; GPL1708: Agilent-012391 Whole Human Genome Oligo Microarray G4112A; GPL4133: Agilent-014850 Whole Human Genome Microarray 4x44K G4112F; GPL6947: Illumina HumanHT-12 V3.0 Expression Beadchip; GPL8269: Agilent UNC PerouLab 244K Custom Human Array version 5; GPL13667: [HG-U219] Affymetrix Human Genome U219 Array; †Median (range).
